# Supplementary material for: Quality of nutrition services in primary health care facilities of Dhaka city: State of nutrition mainstreaming in urban Bangladesh
Source: PubMed Central journal article supplement (PMC9749975; doi:10.1371/journal.pone.0278621), 2022-12-14
Supplement: pone.0278621.s001.pdf [file pone.0278621.s001.pdf]

**S1 Table: List of health facilities**

| <b>Sl no.</b> | <b>Hospital name</b>                                                 | <b>Managed by</b>  | <b>Located area</b> |
|---------------|----------------------------------------------------------------------|--------------------|---------------------|
| 1.            | Institute of Child Health & Shishu Sashtha Foundation Hospital       | NGO                | Mirpur              |
| 2.            | MCH-FP Centre (Radda Plan)                                           | NGO                | Mirpur              |
| 3.            | MCH-FP Centre (Radda Plan)                                           | NGO                | Mirpur              |
| 4.            | MCH-FP Centre (Radda Plan)                                           | NGO                | Mirpur              |
| 5.            | Surjer Hashi Clinic                                                  | NGO                | Mirpur              |
| 6.            | Surjer Hashi Clinic                                                  | NGO                | Mirpur              |
| 7.            | Surjer Hashi Clinic                                                  | NGO                | Mohammadpur         |
| 8.            | Surjer Hashi Clinic                                                  | NGO                | Sabujbag            |
| 9.            | Surjer Hashi Clinic                                                  | NGO                | Razarbazar          |
| 10.           | Surjer Hashi Clinic                                                  | NGO                | Mirpur              |
| 11.           | Surjer Hashi Clinic                                                  | NGO                | Mirpur              |
| 12.           | Surjer Hashi Clinic                                                  | NGO                | Wari                |
| 13.           | Surjer Hashi Clinic                                                  | NGO                | Mirpur              |
| 14.           | Surjer Hashi Clinic                                                  | NGO                | Mohammadpur         |
| 15.           | Surjer Hashi Clinic                                                  | NGO                | Mirpur              |
| 16.           | Surjer Hashi Clinic                                                  | NGO                | Jatrabari           |
| 17.           | Surjer Hashi Clinic                                                  | NGO                | Mirpur              |
| 18.           | Surjer Hashi Clinic                                                  | NGO                | Badda               |
| 19.           | Surjer hasi clinic                                                   | NGO                | Mirpur              |
| 20.           | Ad-Din Medical College Hospital                                      | Private For Profit | Moghbar             |
| 21.           | Al Arafat Hospital                                                   | Private for profit | Mitford             |
| 22.           | Al-Sami Hospital (pvt.)                                              | Private For Profit | Badda               |
| 23.           | Anwar Khan Modern Hospital Ltd.                                      | Private for profit | Dhanmondi           |
| 24.           | Bangladesh Association for the Aged & of Geriatric Medicine (BAAIGM) | Private for profit | Agargaon            |
| 25.           | Bangladesh Medical College and Hospital-Dhanmondi                    | Private For Profit | Dhanmondi           |
| 26.           | Care Medical College Hospital                                        | Private for profit | Mohammadpur         |
| 27.           | Dhaka Central International Medical College Hospital                 | Private For Profit | Mohammadpur         |
| 28.           | Dhaka Pediatric-Neonatal & General Hospital Ltd.                     | Private For Profit | Mohammadpur         |
| 29.           | Dhaka Renal & general Hospital                                       | Private For Profit | Dhanmondi           |
| 30.           | Dr. Azmal Hospital                                                   | Private For Profit | Mirpur              |
| 31.           | Farazy Diagnostic & Hospital LTd                                     | Private For Profit | Rampura             |
| 32.           | Health Aid Diagnostic & Hospital                                     | Private for profit | Sabujbag            |
| 33.           | Holy Family Red Crescent Medical college Hospital                    | Private For Profit | Eskaton             |
| 34.           | IBN Sina Medical college & hospital                                  | Private For Profit | Kallaynpur          |
| 35.           | Islami bank Central Hospital                                         | Private for profit | Kakrail             |
| 36.           | Islami Bank Hospital                                                 | Private For Profit | Mirpur              |

|     |                                                                    |                    |               |
|-----|--------------------------------------------------------------------|--------------------|---------------|
| 37. | Khidmah Hospital (Pvt.) Ltd.                                       | Private For Profit | Khilgaon      |
| 38. | Life & care Hospital                                               | Private For Profit | Hazaribagh    |
| 39. | Lubana General Hospital                                            | Private For Profit | Uttara        |
| 40. | Monowara Orthopedic and General Hospital                           | Private for profit | Maniknagar    |
| 41. | Mother and Infant Health Care Hospital-Khilgaon                    | Private for profit | Khilgaon      |
| 42. | Nibedita Medical & Research                                        | Private For Profit | Dhanmondi     |
| 43. | Pancare Hospital Ltd.                                              | Private For Profit | Dhanmondi     |
| 44. | Redical Hospital                                                   | Private For Profit | Uttara        |
| 45. | Salauddin Specialized Hospital Ltd.                                | Private for profit | Tikatoli      |
| 46. | Seba Maternity Clinic                                              | Private for profit | Cantonment    |
| 47. | Snehaloy                                                           | Private For Profit | Moghbar       |
| 48. | United Hospital Ltd.                                               | Private For Profit | Gulshan       |
| 49. | Uttara Central Hospital                                            | Private For Profit | Uttara        |
| 50. | Selina General Hospital and diagnostic center                      | Private For Profit | Mirpur        |
| 51. | Shaheed Monsur Ali Medical College hospital                        | Private For Profit | Uttara        |
| 52. | Uttara Modern Medical College Hospital                             | Private for profit | Uttara        |
| 53. | Sasto Seba Cenro Badda                                             | Private for profit | Uttor Badda   |
| 54. | Medilink Hospital LTD.                                             | Private for profit | Badda         |
| 55. | Primary Health Care Centre-2                                       | Private For Profit | Mirpur        |
| 56. | Al-Haj Johurul Islam Nagor Matrisodon Cenro-2                      | Private For Profit | Mirpur        |
| 57. | Zainul Haque Sikder Woman`s Medical College & Hospital (Pvt.) Ltd. | Private For Profit | Dhanmondi     |
| 58. | Bangladesh specialized Hospital Ltd                                | Private For Profit | Shaymoli      |
| 59. | Ashkona Clinic                                                     | Private For Profit | Uttara        |
| 60. | Fast Aid Hospital Ltd                                              | Private For Profit | Kamrangirchor |
| 61. | Medicare Diagnostic and Hospital                                   | Private For Profit | Kamrangirchor |
| 62. | Bangabandhu Sheikh Mujib Medical University (BSMMU)                | Public Autonomous  | Shahbag       |
| 63. | 500 Bedded General Hospital, Mugda                                 | Public Only        | Sabujbag      |
| 64. | Bangladesh Railway Hospital                                        | Public Only        | Kamlapur      |
| 65. | BAVS Maternity                                                     | Public only        | Mirpur        |
| 66. | Dhaka Medical College Hospital                                     | Public Only        | Chankarpul    |
| 67. | Kuwait Bangladesh Friendship Govt. Hospital                        | Public Only        | Uttara        |
| 68. | Mohammadpur Fertility Services and Training Center (MFSTC)         | Public Only        | Mohammadpur   |
| 69. | Motijheel G.O. D Matrishodon Kendra                                | Public Only        | Motijheel     |
| 70. | OGSB Hospital & Institute of Reproductive and Child Health (IRCH)  | Public only        | Mirpur        |
| 71. | Shaheed Shorowardy Medical College Hospital                        | Public Only        | Agargaon      |
| 72. | Sir Salimullah Medical College ( SSMC )                            | Public Only        | Mitford       |
| 73. | Tofirunasha Praibaric Shastha Clinic                               | Public only        | Nikunjo       |
| 74. | Sorkari Karmachari Hospital                                        | Public Only        | Tejgaon       |
| 75. | Kendreo Police Hospital                                            | Public Only        | Rajarbag      |

|     |                              |             |             |
|-----|------------------------------|-------------|-------------|
| 76. | Nagar Sastha Kendro-sabujbag | Public only | Sabujbag    |
| 77. | Nagar Sastho Cenro KMSS PA-2 | Public only | Tejgaon     |
| 78. | Nagar Sastho Cenro KMSS PA-4 | Public only | Motijheel   |
| 79. | Nagar Sastho-01( UTPS)       | Public only | Darus Salam |
