# Supplementary material for: Quality of nutrition services in primary health care facilities of Dhaka city: State of nutrition mainstreaming in urban Bangladesh
Source: PubMed Central journal article supplement (PMC9749975; doi:10.1371/journal.pone.0278621), 2022-12-14
Supplement: pone.0278621.s002.pdf [file pone.0278621.s002.pdf]

**S2 Table: Scoring of knowledge questions about nutrition counselling among health service providers**

| <b>Sl no.</b> | <b>Knowledge about topics of nutrition counselling should be discussed during ANC visit among ANC providers</b>                                         | <b>Response</b> | <b>Score</b> |
|---------------|---------------------------------------------------------------------------------------------------------------------------------------------------------|-----------------|--------------|
| 1             | Animal source foods                                                                                                                                     | Yes             | 1            |
|               |                                                                                                                                                         | No              | 0            |
| 2             | Vitamin A rich foods                                                                                                                                    | Yes             | 1            |
|               |                                                                                                                                                         | No              | 0            |
| 3             | Fruits and vegetables                                                                                                                                   | Yes             | 1            |
|               |                                                                                                                                                         | No              | 0            |
| 4             | Frequency of food consumption                                                                                                                           | Yes             | 1            |
|               |                                                                                                                                                         | No              | 0            |
| 5             | Iodized Salt                                                                                                                                            | Yes             | 1            |
|               |                                                                                                                                                         | No              | 0            |
| 6             | Iron folic acid supplementation                                                                                                                         | Yes             | 1            |
|               |                                                                                                                                                         | No              | 0            |
| 7             | Calcium supplementation                                                                                                                                 | Yes             | 1            |
|               |                                                                                                                                                         | No              | 0            |
| 8             | Early initiation of breastfeeding                                                                                                                       | Yes             | 1            |
|               |                                                                                                                                                         | No              | 0            |
| 9             | On exclusive breastfeeding for 6 months                                                                                                                 | Yes             | 1            |
|               |                                                                                                                                                         | No              | 0            |
| 10            | Dangers of introducing other liquids before 6 month of age                                                                                              | Yes             | 1            |
|               |                                                                                                                                                         | No              | 0            |
|               | <b>Knowledge about topics of infant and young child feeding counseling should be discussed during pediatric visit among pediatric service providers</b> |                 |              |
| 1             | Initiation of breast feeding within an hour of birth                                                                                                    | Yes             | 1            |
|               |                                                                                                                                                         | No              | 0            |
| 2             | Giving baby only breast milk and no other liquids or solids not even water for 1 <sup>st</sup> 6 month of life                                          | Yes             | 1            |
|               |                                                                                                                                                         | No              | 0            |

|    |                                                                                                                         |     |   |
|----|-------------------------------------------------------------------------------------------------------------------------|-----|---|
| 3  | Breastfeed more frequently if a mother thinks her baby is not getting enough breast milk                                | Yes | 1 |
|    |                                                                                                                         | No  | 0 |
| 4  | Mother of a <6 month-old baby should not stop breastfeeding if the mother becomes ill                                   | Yes | 1 |
|    |                                                                                                                         | No  | 0 |
| 5  | A baby should be breastfed till 24 months                                                                               | Yes | 1 |
|    |                                                                                                                         | No  | 0 |
| 6  | A baby should first receive water or other liquid at the age of 6 month                                                 | Yes | 1 |
|    |                                                                                                                         | No  | 0 |
| 7  | A baby should first start to receive semi-solid (e.g. rice, khichuri) food other than breast milk at the age of 6 month | Yes | 1 |
|    |                                                                                                                         | No  | 0 |
| 8  | A baby should first start to receive animal source foods (e.g. beef, chicken, egg, fish) at the age of 6 month          | Yes | 1 |
|    |                                                                                                                         | No  | 0 |
| 9  | A mother should not stop breastfeeding if the child is ill                                                              | Yes | 1 |
|    |                                                                                                                         | No  | 0 |
| 10 | A child >6 months with diarrhea requires zinc supplementation                                                           | Yes | 1 |
|    |                                                                                                                         | No  | 0 |
